# Supplementary material for: Isocyanide substitution reactions at the trans labile sites of an iron(ii) N-heterocyclic carbene complex
Source: Royal Society of Chemistry journal article supplement (doi:10.1039/c5ra18270k), 2015-01-01
Supplement: c5ra18270k1.pdf [file c5ra18270k1.pdf]

## Supporting Information

# Isocyanide Substitution Reactions at the Trans Labile Sites of an Iron(II) N-Heterocyclic Carbene Complex

*Stefan Haslinger,<sup>a</sup> Anja C. Lindhorst,<sup>a</sup> Jens W. Kück,<sup>a</sup> Mirza Cokoja,<sup>b</sup> Alexander Pöthig,<sup>c</sup> and  
Fritz E. Kühn<sup>a\*</sup>*

- [a] Chair of Inorganic Chemistry/Molecular Catalysis, Technische Universität München (TUM), Ernst-Otto-Fischer-Straße 1, D-85747 Garching bei München, Germany. Tel: (+49) 89 289 13096. Fax: (+)49 89 289 13473. E-mail: fritz.kuehn@ch.tum.de
- [b] Chair of Inorganic and Organometallic Chemistry, Technische Universität München (TUM), Ernst-Otto-Fischer-Straße 1, D-85747 Garching bei München, Germany.
- [c] Catalysis Research Center, Technische Universität München (TUM), Ernst-Otto-Fischer-Straße 1, D-85747 Garching bei München, Germany.

## Content

|                                                                 |     |
|-----------------------------------------------------------------|-----|
| 1. NMR spectra of <b>2b</b> .....                               | S2  |
| 2. NMR spectra of <b>3a</b> .....                               | S4  |
| 3. NMR spectra of <b>3b</b> .....                               | S6  |
| 4. NMR spectra of <b>4a</b> .....                               | S8  |
| 5. NMR spectra of <b>4b</b> .....                               | S10 |
| 6. NMR spectra of <b>5a</b> .....                               | S12 |
| 7. NMR spectra of <b>5b</b> .....                               | S14 |
| 8. Identification of disubstituted intermediate <b>2c</b> ..... | S16 |

## 1. NMR spectra of 2b

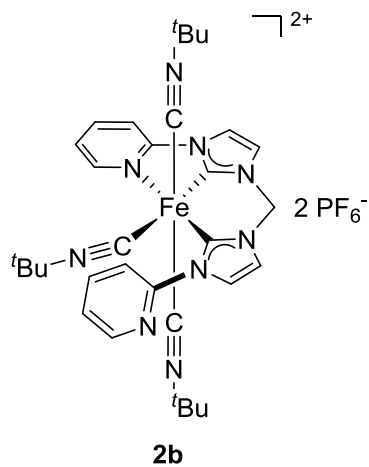

Figure S1. Structure of compound **2b**.

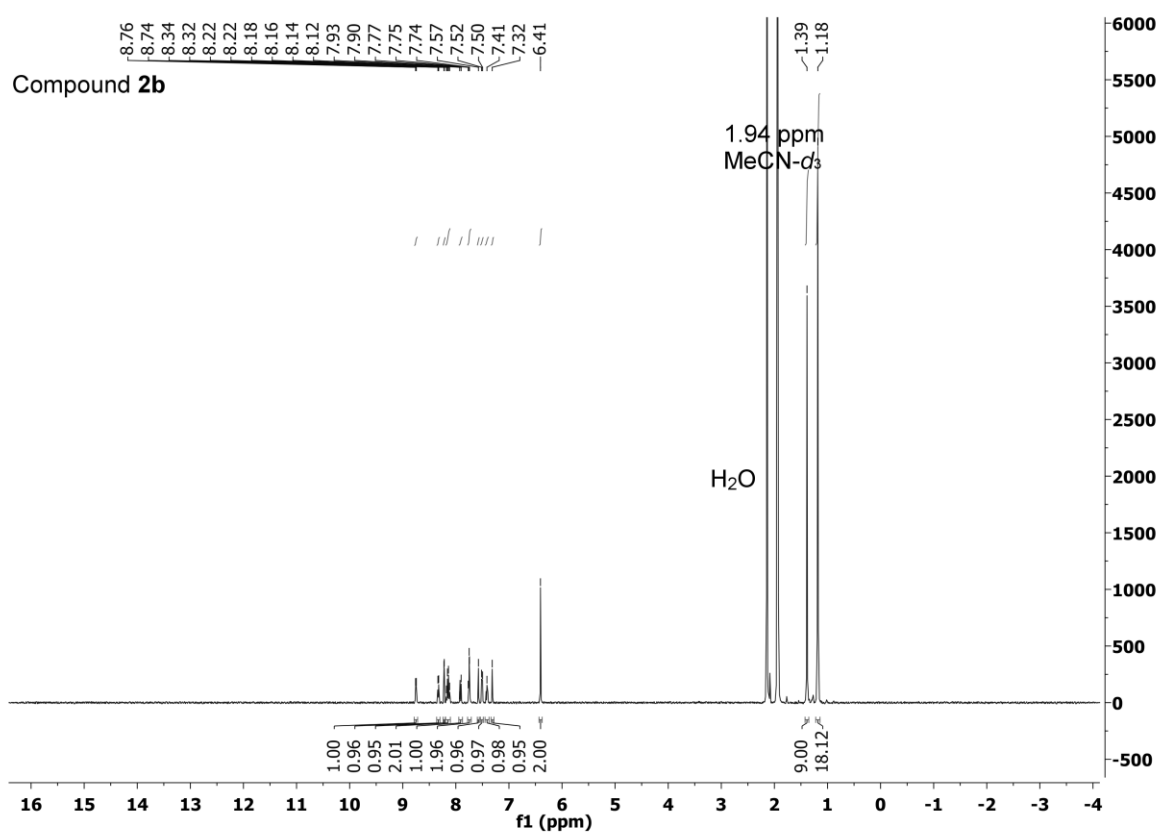

Figure S2. <sup>1</sup>H NMR of **2b** in MeCN-*d*<sub>3</sub> at 400.13 MHz.

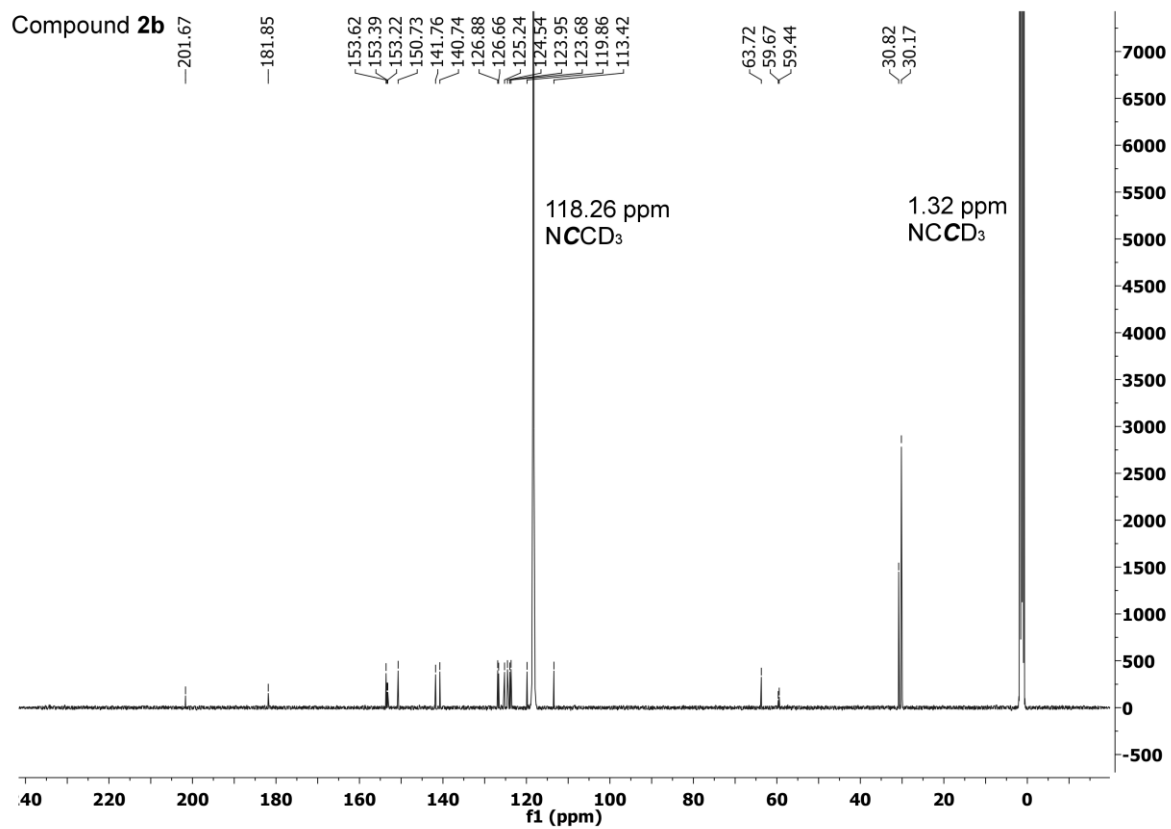

Figure S3.  $^{13}\text{C}\{^1\text{H}\}$  NMR of **2b** in  $\text{MeCN-}d_3$  at 125.83 MHz.

## 2. NMR spectra of 3a

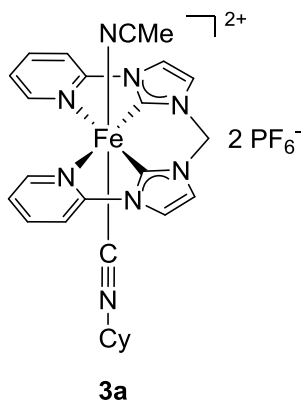

Figure S4. Structure of compound **3a**.

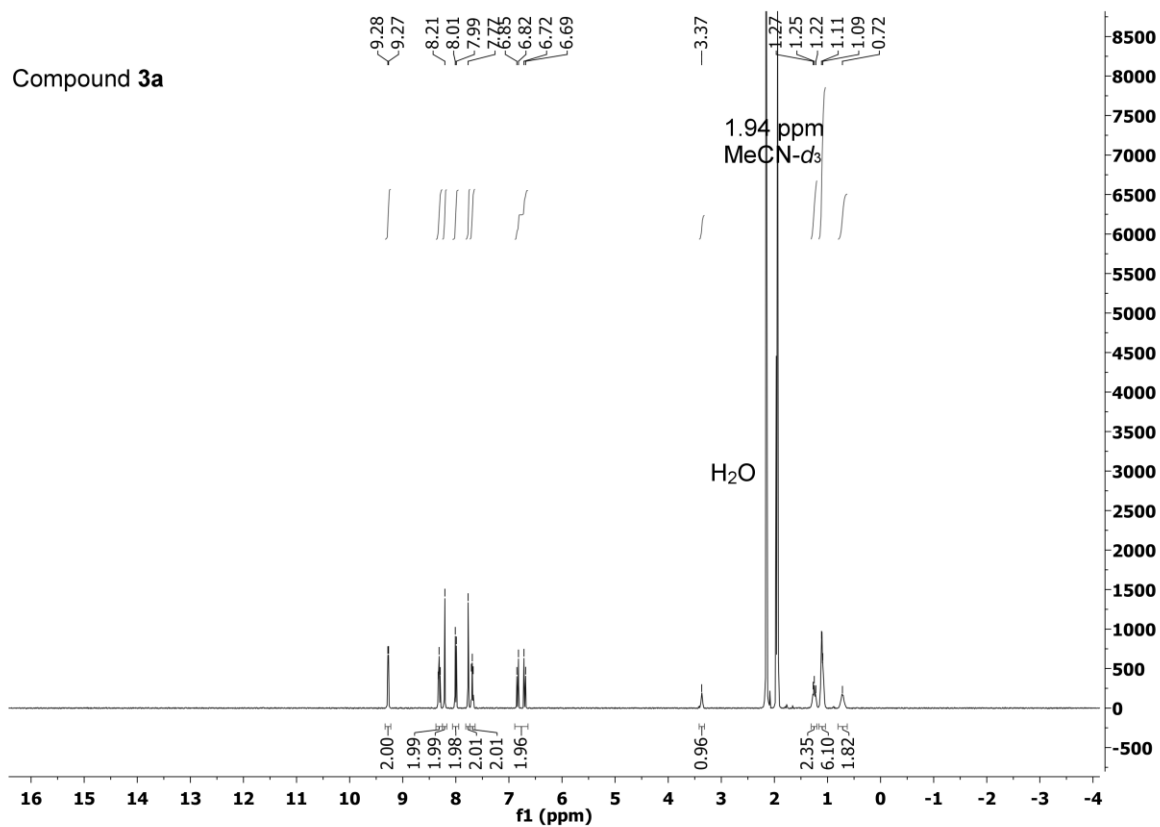

Figure S5.  $^1\text{H}$  NMR of **3a** in  $\text{MeCN-}d_3$  at 400.13 MHz.

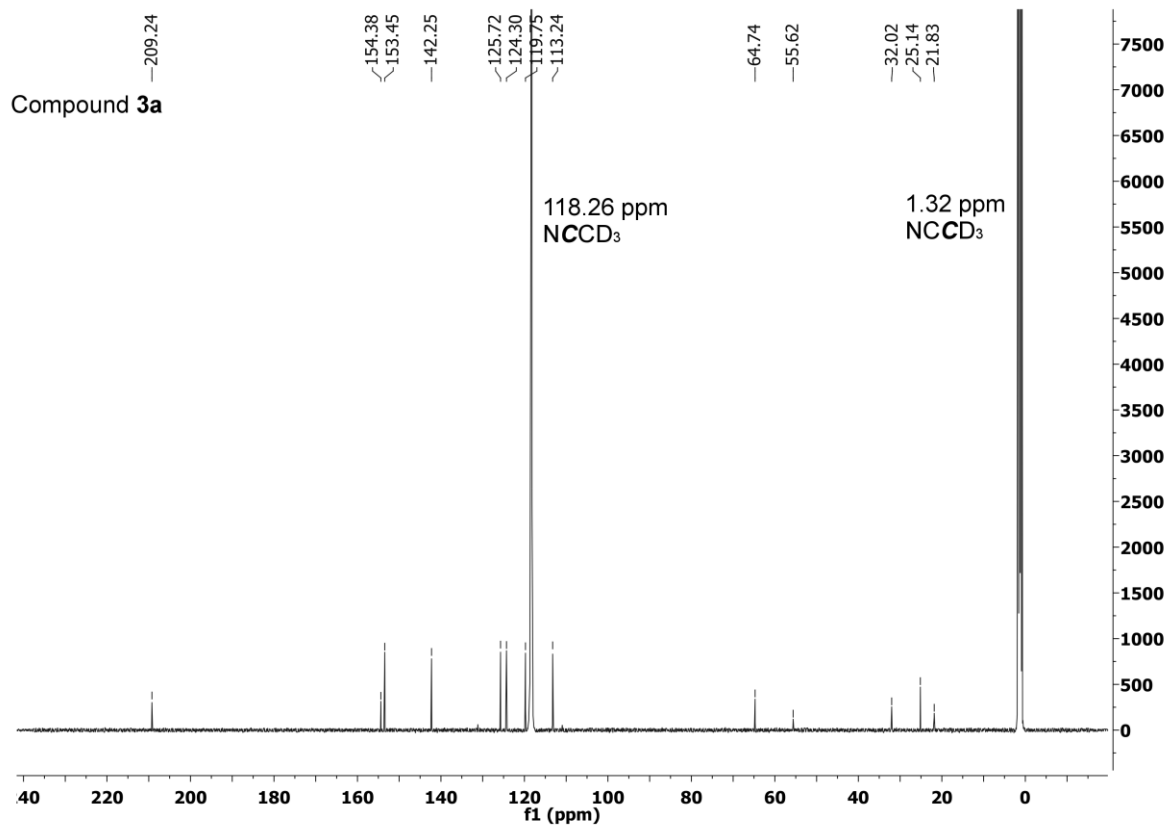

Figure S6.  $^{13}\text{C}\{^1\text{H}\}$  NMR of **3a** in  $\text{MeCN-}d_3$  at 125.83 MHz.

### 3. NMR spectra of 3b

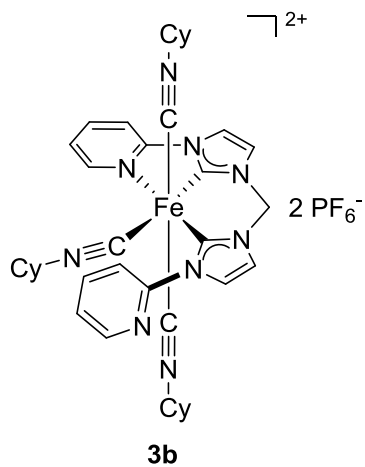

Figure S7. Structure of compound **3b**.

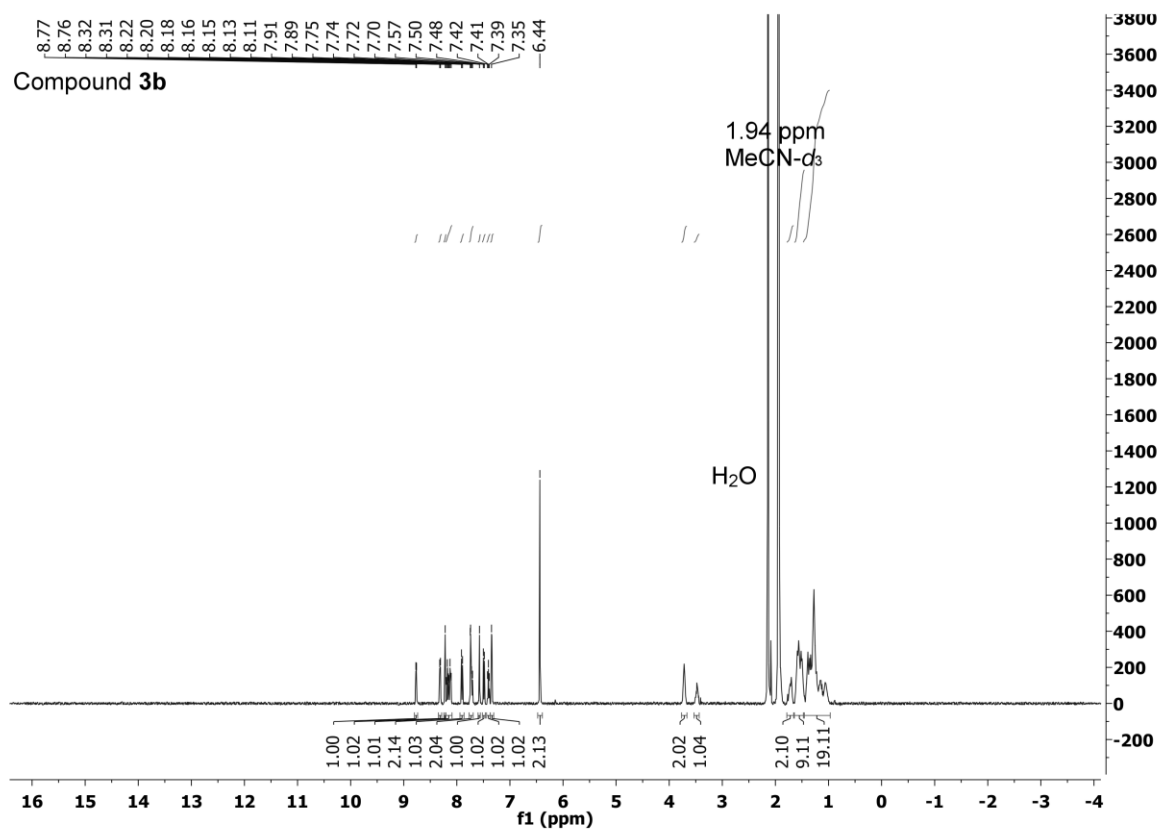

Figure S8. <sup>1</sup>H NMR of **3b** in MeCN-*d*<sub>3</sub> at 400.13 MHz.

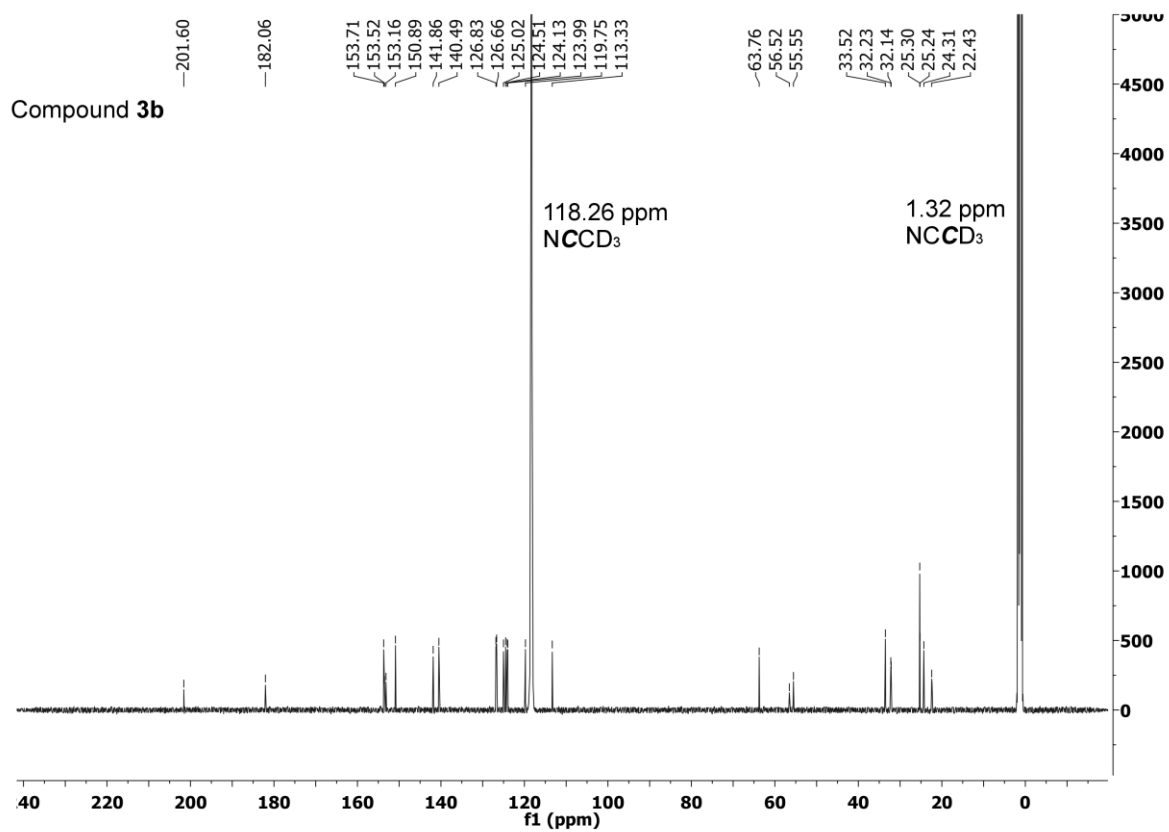

Figure S9.  $^{13}\text{C}\{^1\text{H}\}$  NMR of **3b** in MeCN- $d_3$  at 125.83 MHz.

#### 4. NMR spectra of 4a

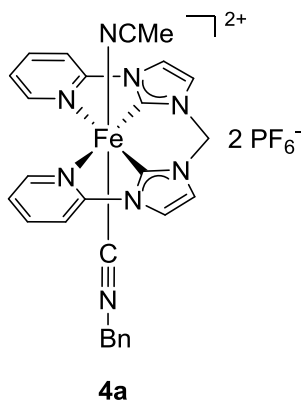

Figure S10. Structure of compound **4a**.

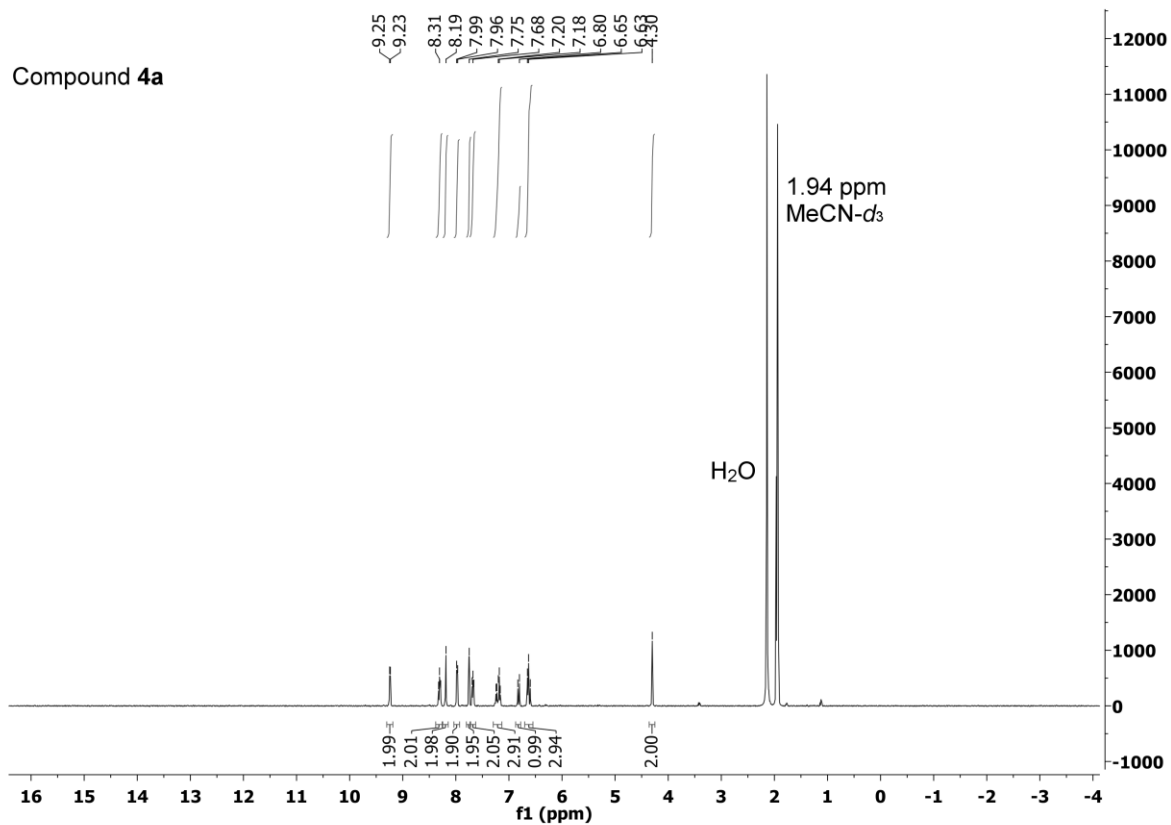

Figure S11.  $^1\text{H}$  NMR of **4a** in  $\text{MeCN-}d_3$  at 400.13 MHz.



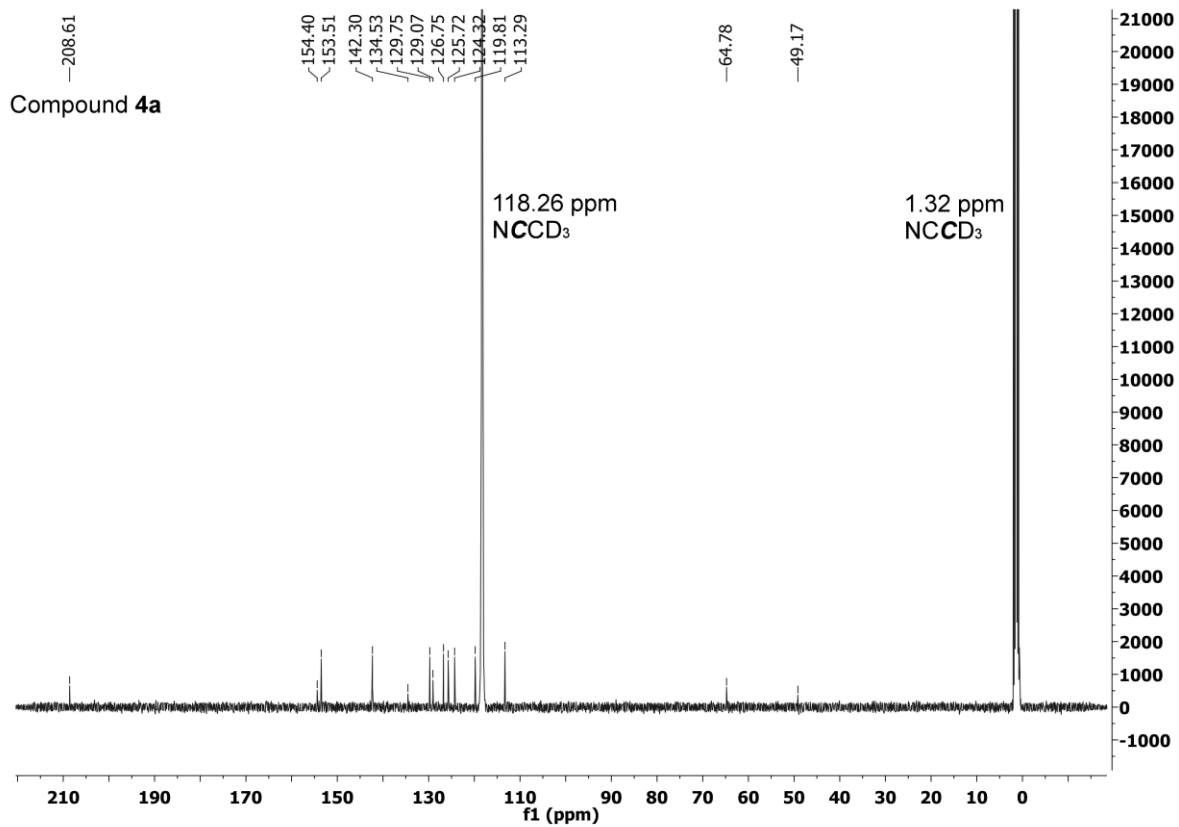

Figure S12.  $^{13}\text{C}\{^1\text{H}\}$  NMR of **4a** in MeCN- $d_3$  at 125.83 MHz.

## 5. NMR spectra of 4b

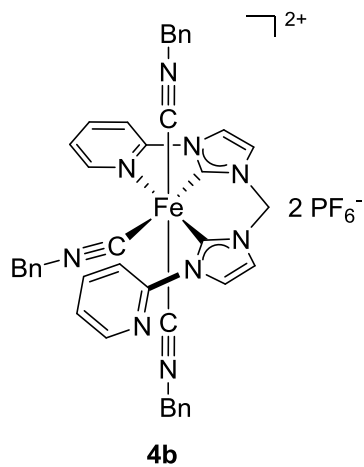

Figure S13. Structure of compound **4b**.

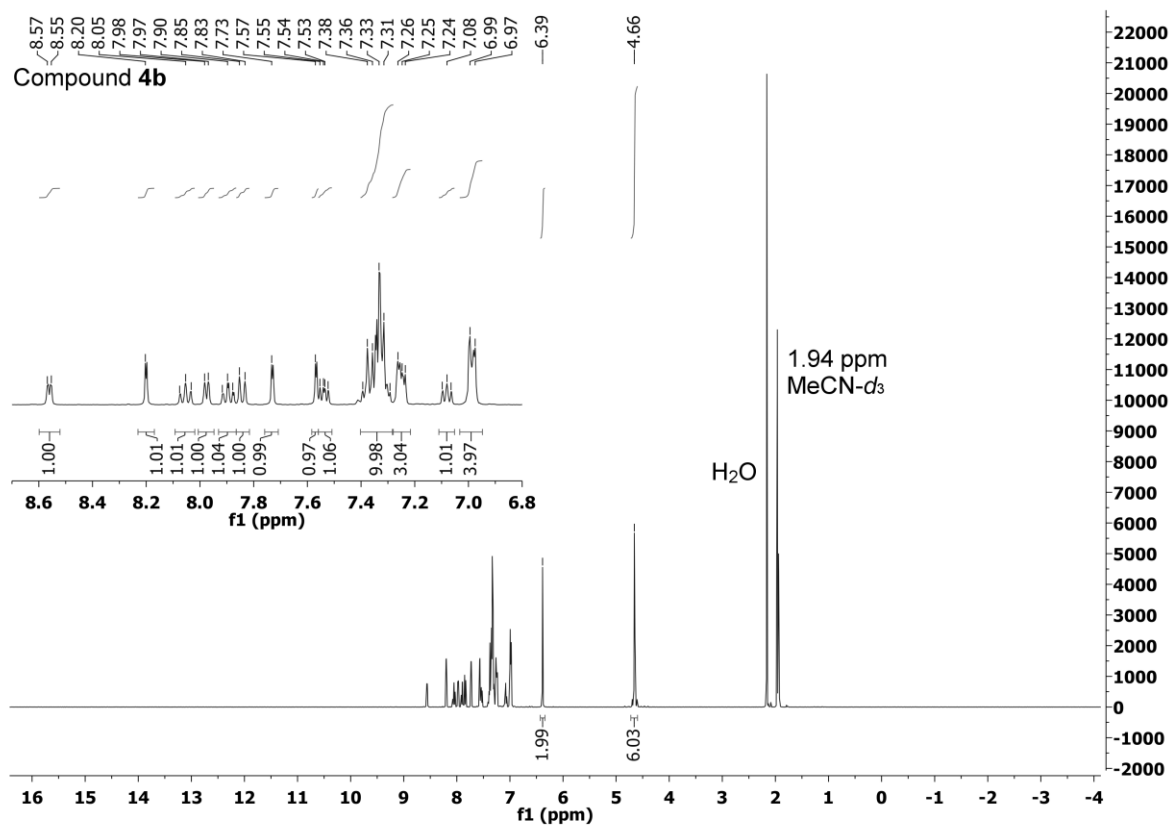

Figure S14.  $^1\text{H}$  NMR of **4b** in  $\text{MeCN-}d_3$  at 400.13 MHz.

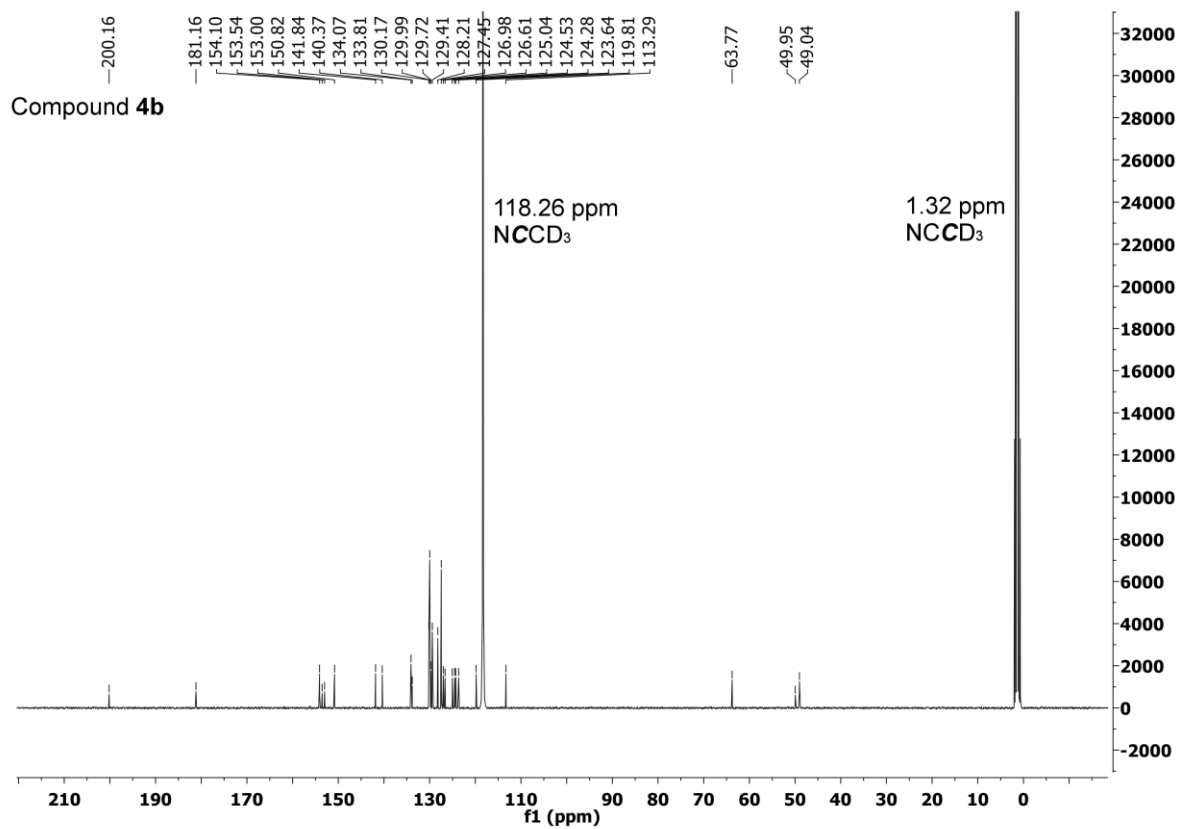

Figure S15.  $^{13}\text{C}\{^1\text{H}\}$  NMR of **4b** in MeCN- $d_3$  at 125.83 MHz.

## 6. NMR spectra of 5a

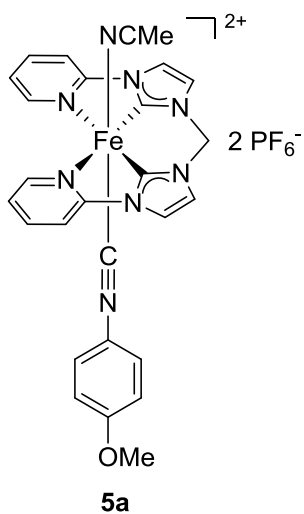

Figure S16. Structure of compound **5a**.

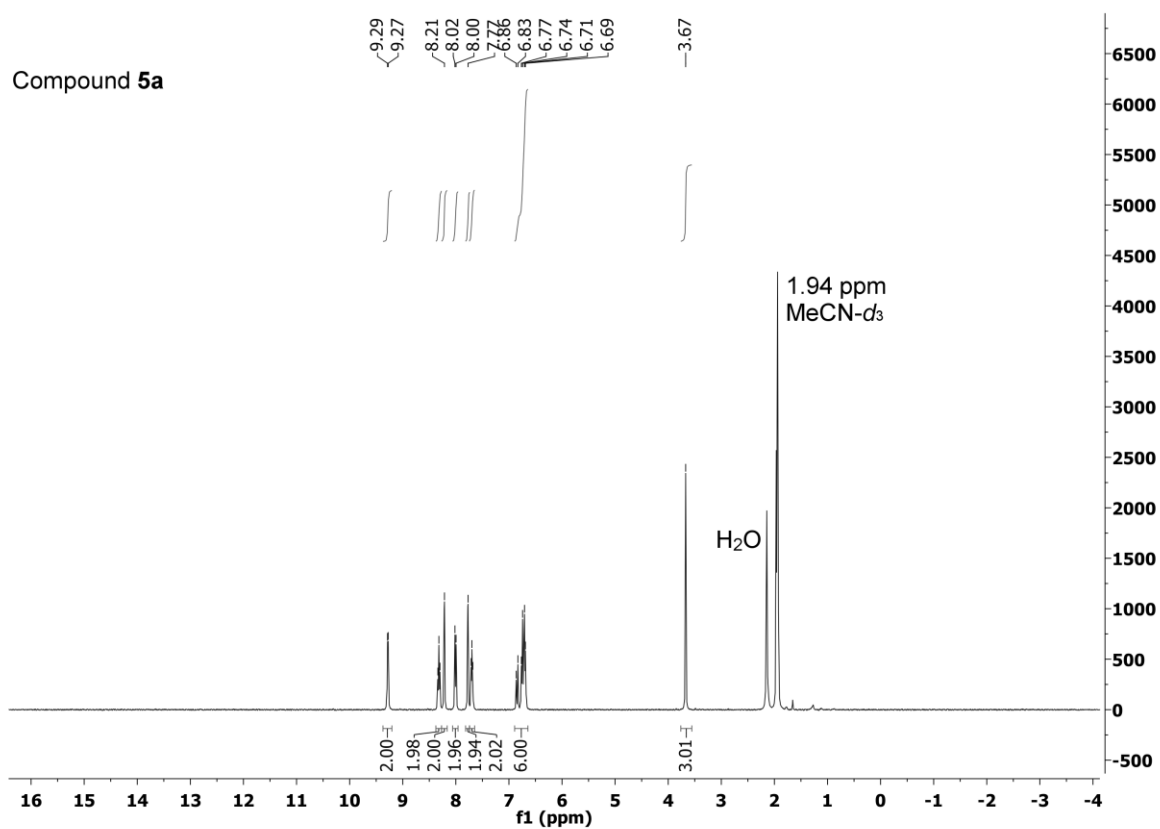

Figure S17. <sup>1</sup>H NMR of **5a** in MeCN-*d*<sub>3</sub> at 400.13 MHz.

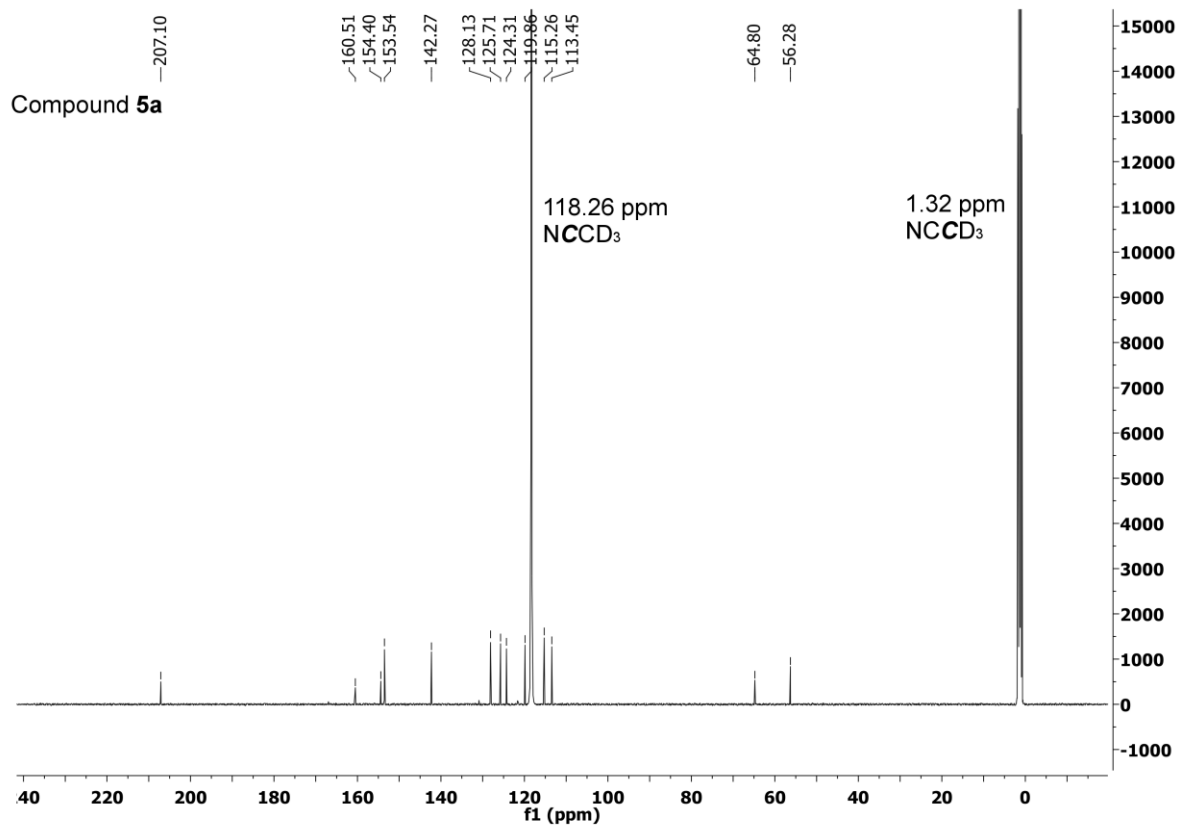

Figure S18.  $^{13}\text{C}\{^1\text{H}\}$  NMR of **5a** in  $\text{MeCN-}d_3$  at 125.83 MHz.

## 7. NMR spectra of 5b

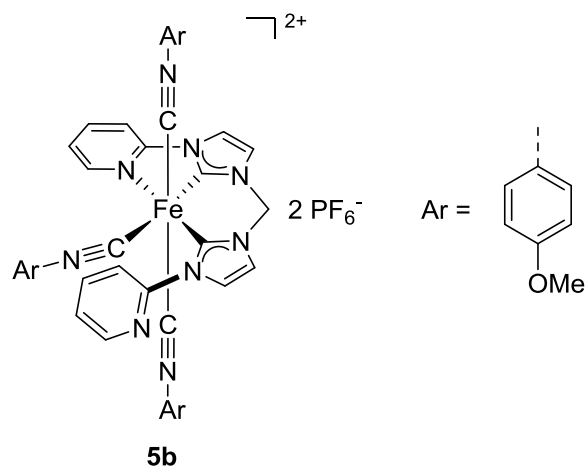

Figure S19. Structure of compound **5b**.

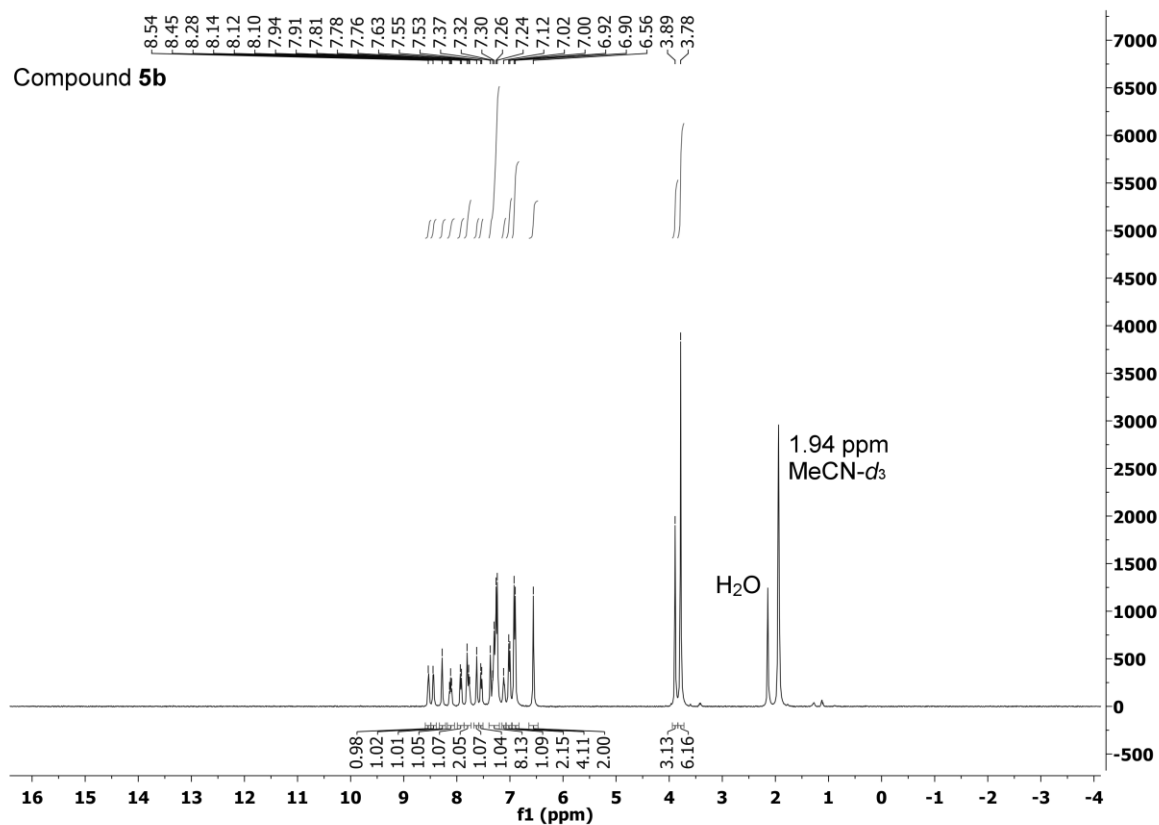

Figure S20. <sup>1</sup>H NMR of **5b** in MeCN-*d*<sub>3</sub> at 400.13 MHz.

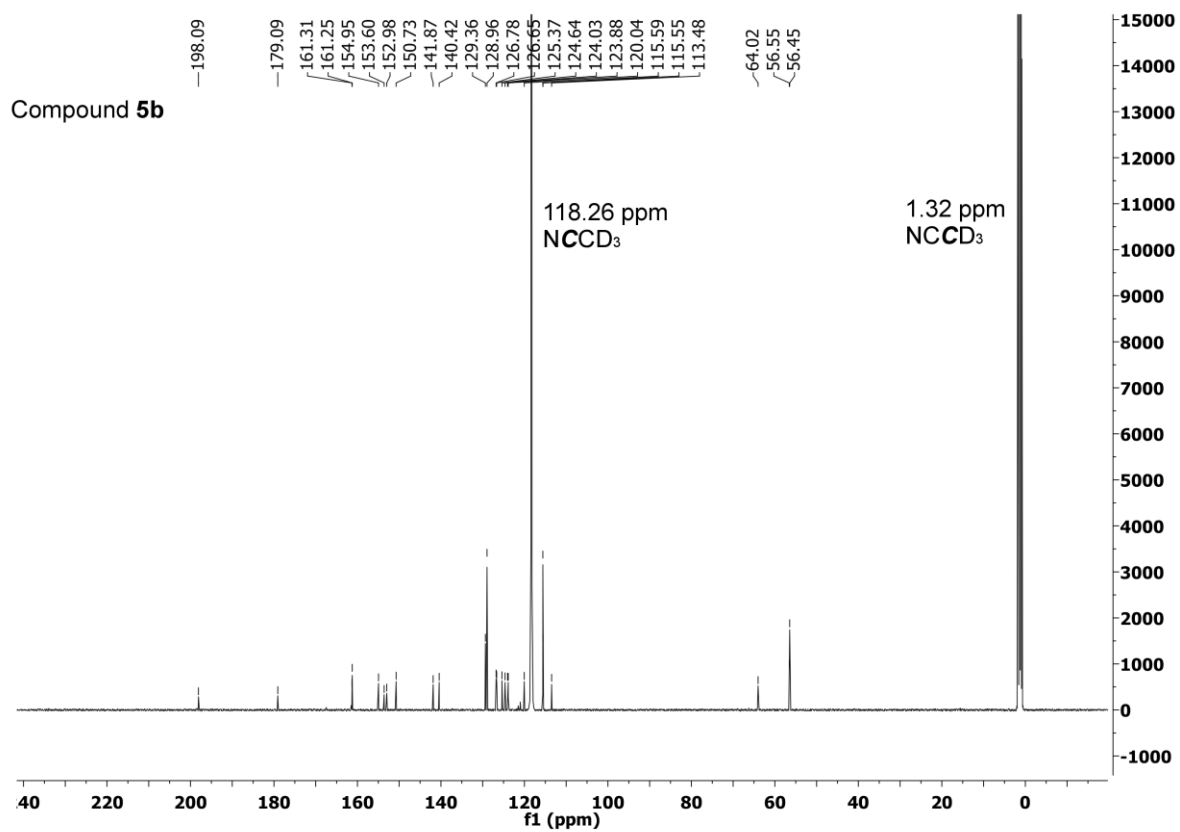

Figure S21.  $^{13}\text{C}\{^1\text{H}\}$  NMR of **5b** in MeCN- $d_3$  at 125.83 MHz.

## 8. Identification of disubstituted intermediate 2c

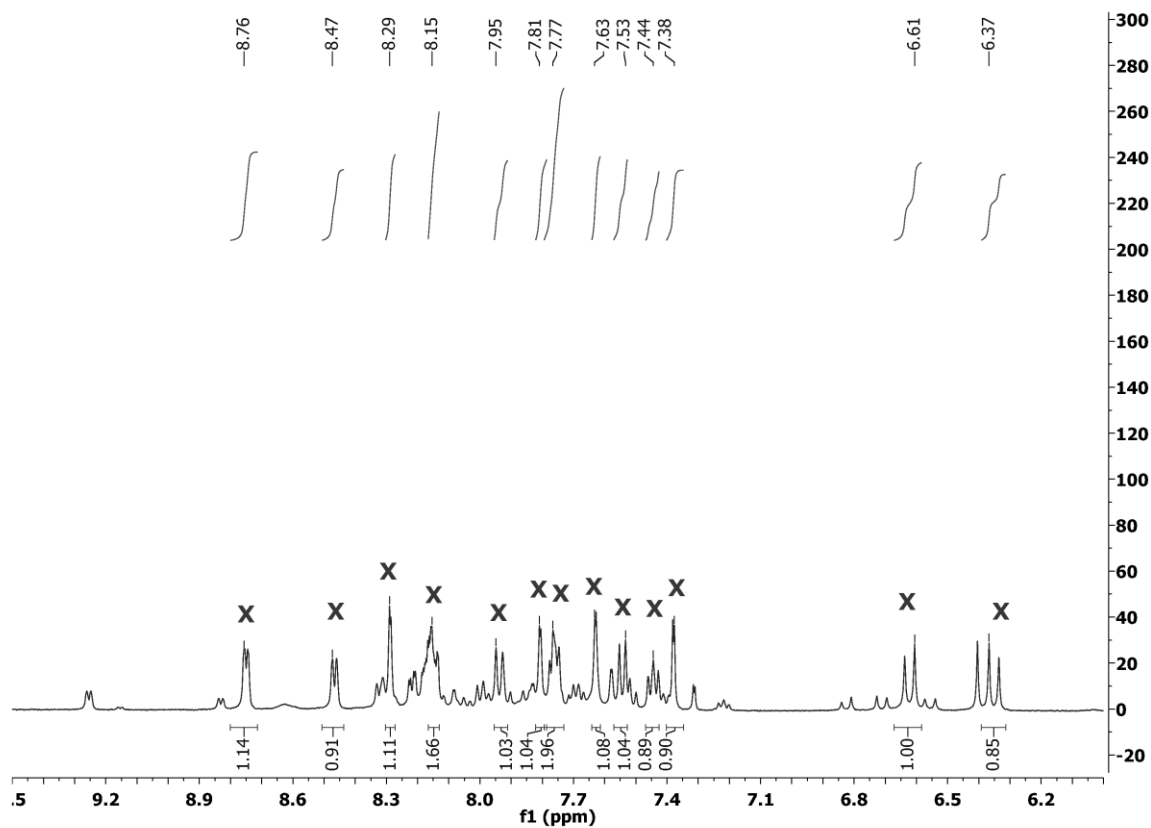

**Figure S22.**  $^1\text{H}$  NMR after 40 min of the time-dependent monitoring of the reaction of **1** with 5 equiv.  $\text{CN}^t\text{Bu}$ . At this point the disubstituted intermediate **2c** has reached its peak amount during the reaction. The peaks marked with an X are assigned to **2c**. The two doublet signals at 6.61 ppm and 6.37 ppm are caused by the  $\text{CH}_2$  bridge of the NCCN ligand (doublet of doublet due to loss of symmetry).
